# Supplementary material for: Portable detection of ochratoxin A in red wine based on a structure-switching aptamer using a personal glucometer
Source: Royal Society of Chemistry journal article supplement (doi:10.1039/c5ra27880e), 2016-01-01
Supplement: c5ra27880e1.pdf [file c5ra27880e1.pdf]

# Detection of Ochratoxin A in Red Wine Based on a Structure-Switching Aptamer Using a Personal Glucometer

*Chunmei Gu†, Feng Long‡\*\*, Xiaohong Zhou†, Hanchang Shi†\**

†State Key Joint Laboratory of ESPC, School of Environment, Tsinghua University,  
Beijing 100084, China

‡School of Environment and Natural Resources, Renmin University of China,  
Beijing, 100872, China

Corresponding author: \*[hanchang@tsinghua.edu.cn](mailto:hanchang@tsinghua.edu.cn);

Co-corresponding author: \*\*[longf04@mails.tsinghua.edu.cn](mailto:longf04@mails.tsinghua.edu.cn);

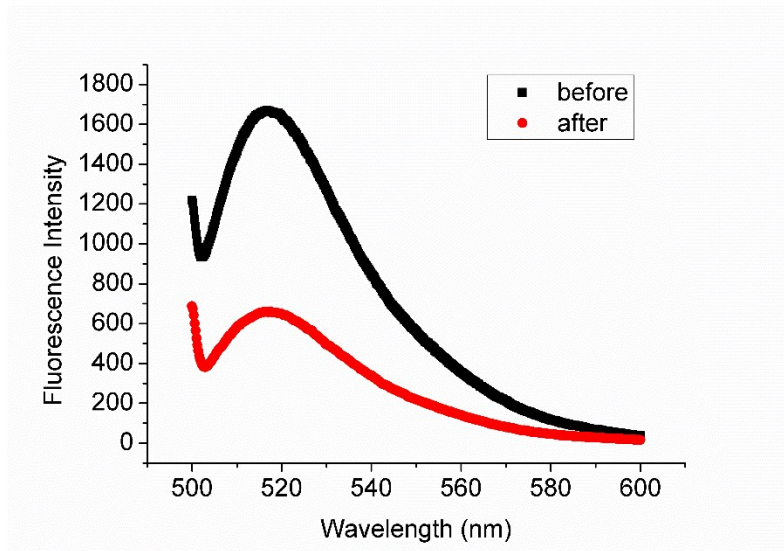

**Figure S1.** Fluorescence spectrum of aptamer-FAM-competitor before and after coupling with magnetic beads.

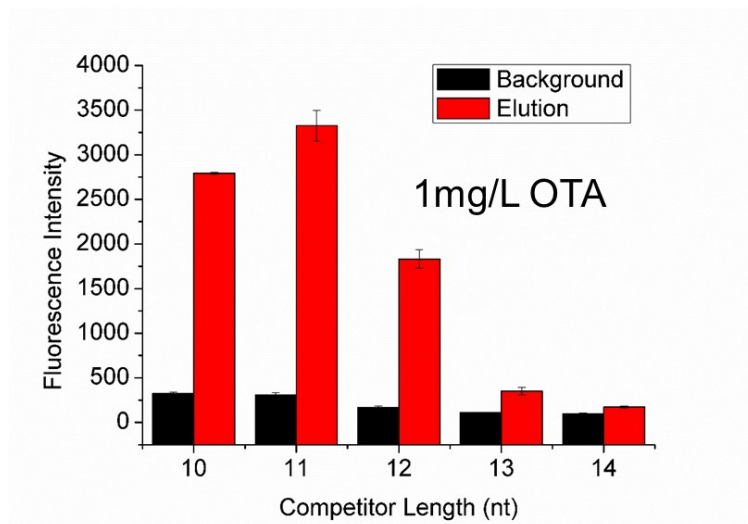

**Figure S2.** Background release and target elution with 1mg/L OTA at different competitor length.

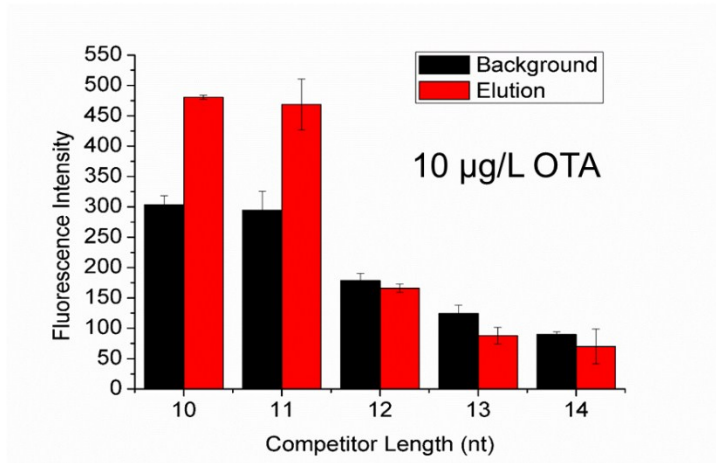

**Figure S3.** Background release and target elution with 10µg/L OTA at different competitor length.

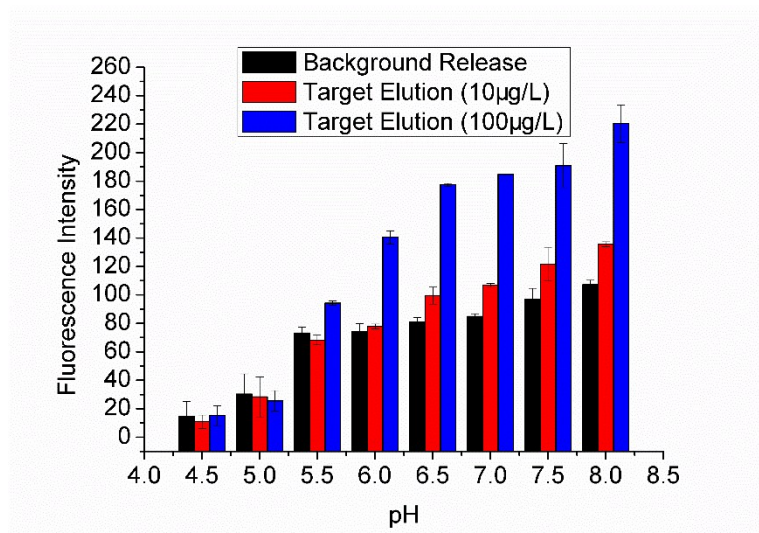

**Figure S4.** Background release and target elution with 10µg/L OTA and 100µg/L OTA at different pH.

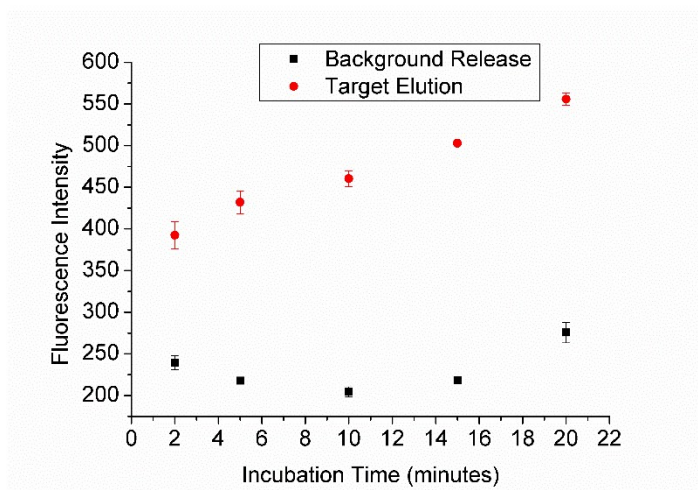

**Figure S5.** Background release (no OTA) and target elution (100  $\mu$ g/L OTA) at different incubation time.

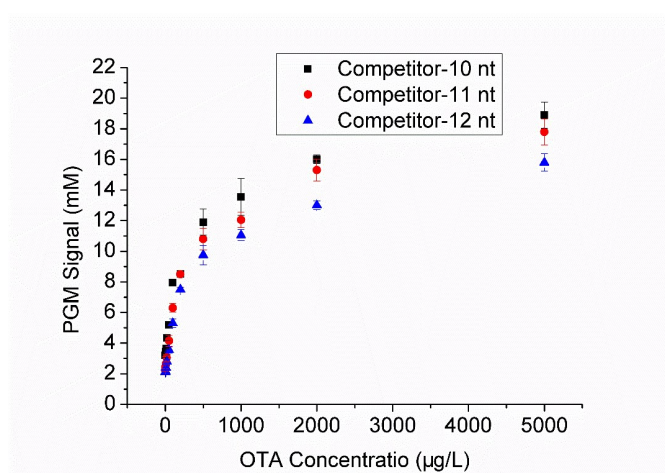

**Figure S6.** Performance of using structure-switching aptamer and PGM to detect OTA in buffer with different competitor-invertase.

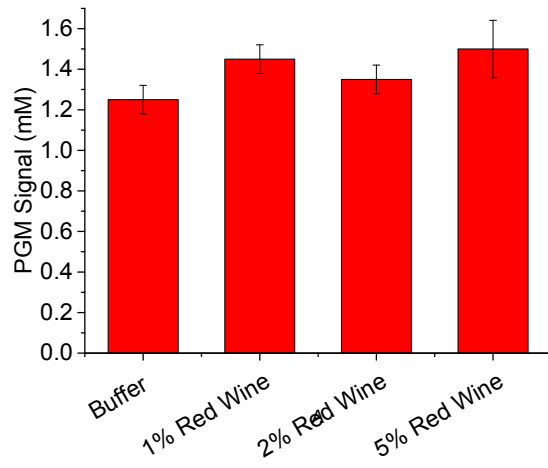

**Figure S7.** Influence of content in red wine on the activity of invertase.
